# Supplementary material for: BioNetBuilder2.0: bringing systems biology to chicken and other model organisms
Source: PubMed Central journal article supplement (PMC2966329; doi:10.1186/1471-2164-10-s2-s6), 2009-07-14

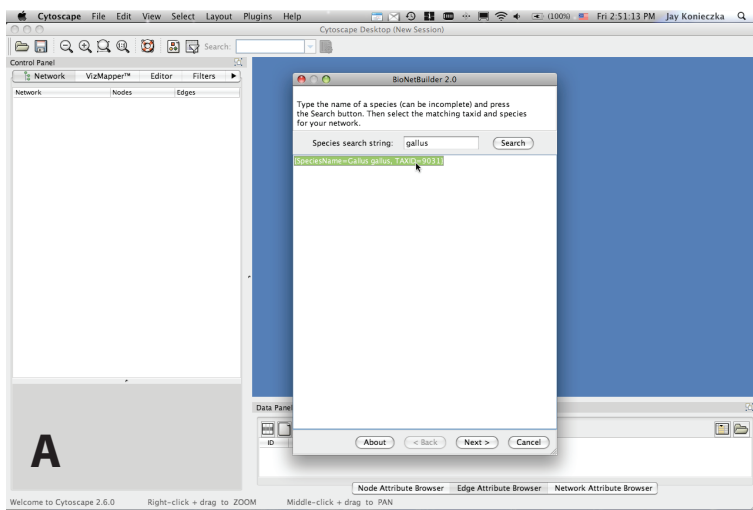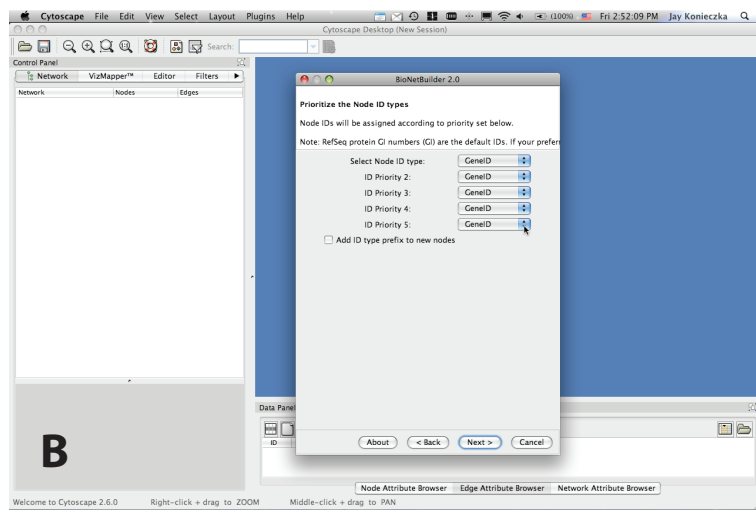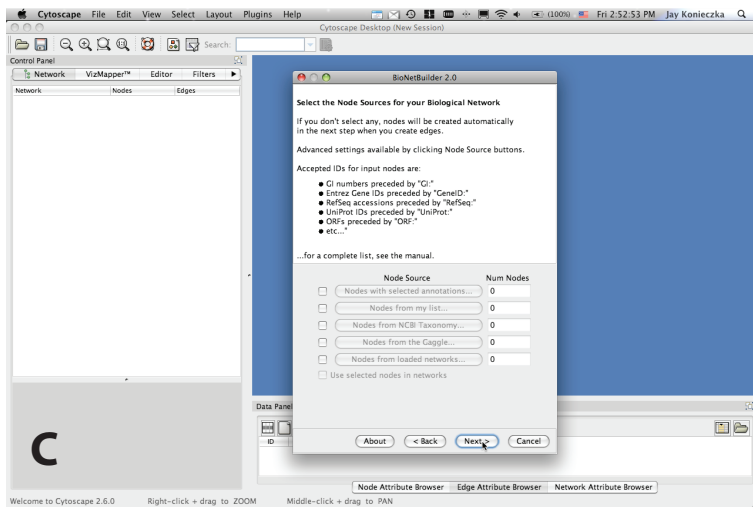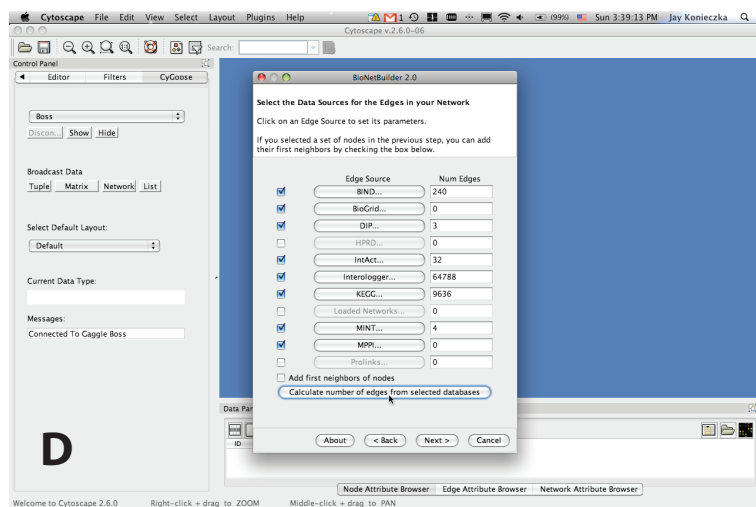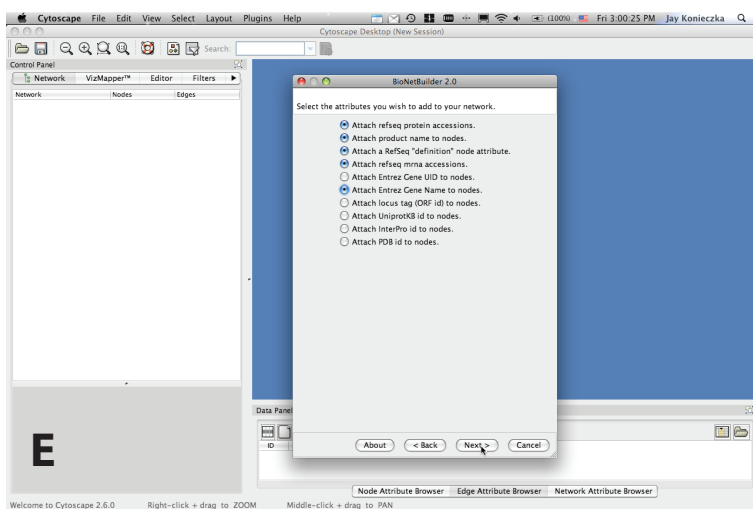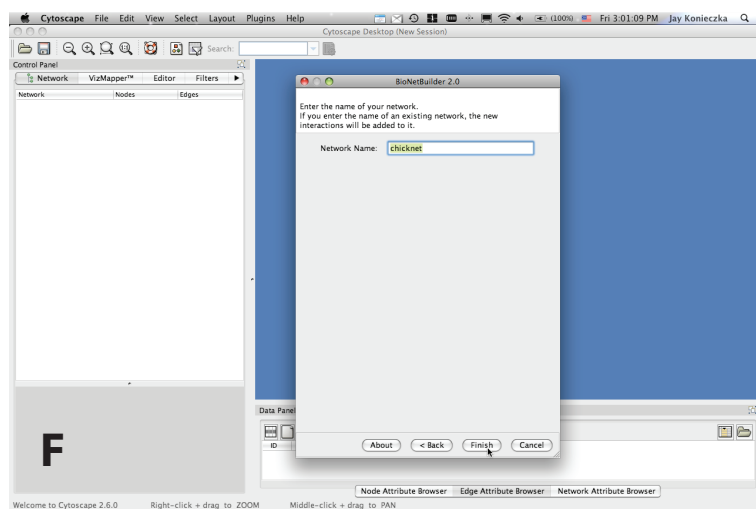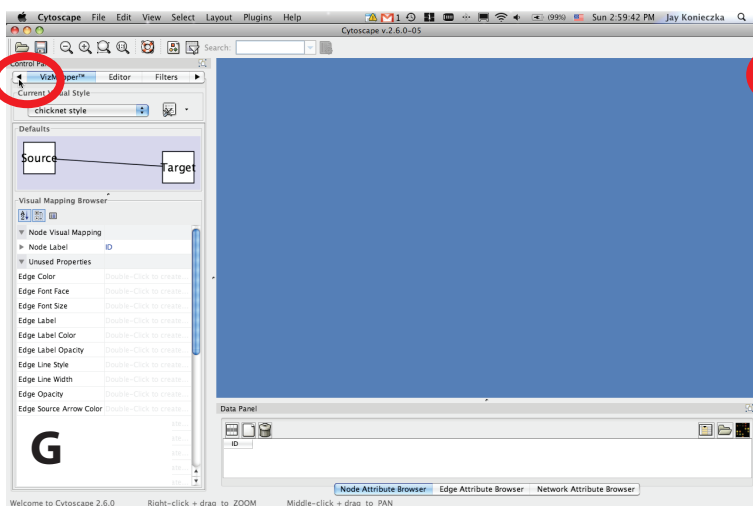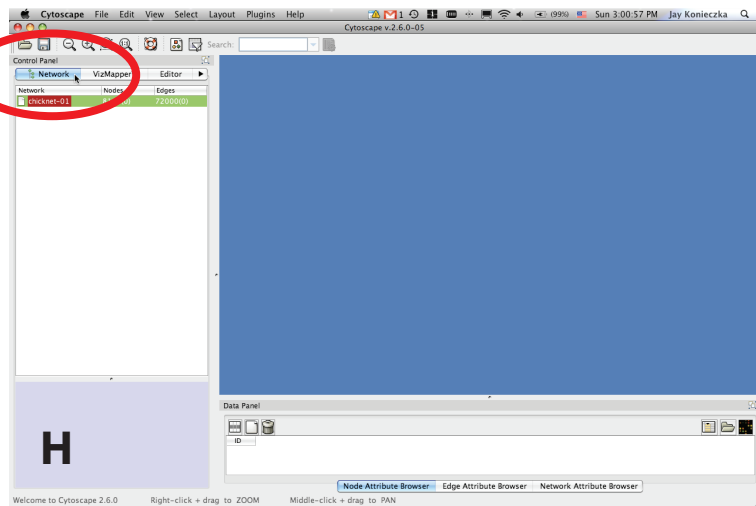

Supplement: 1471-2164-10-S2-S6-S2.pdf [file 1471-2164-10-S2-S6-S2.pdf]
